# Supplementary material
Source: Springer Nature journal article supplement (https://www.springermedizin.de/resource/supplementary/12894_2012_218_MOESM7_ESM.pdf/9513234)
Supplement: MOESM7 [file 9513234]

| <b>Haplotype</b> | <b>Observed</b>      | <b>Expected</b> |
|------------------|----------------------|-----------------|
| CG               | 0.333                | 0.136           |
| AG               | 0                    | 0.197           |
| CC               | 0.075                | 0.272           |
| AC               | 0.592                | 0.394           |
|                  | <b>r<sup>2</sup></b> | .724            |
|                  | <b>D'</b>            | 1,000           |
